# Supplementary material
Source: PubMed Central journal article supplement (PMC3320926)
Supplement: supp_M111.312819_jbc.M111.312819-1.pdf [file supp_M111.312819_jbc.M111.312819-1.pdf]

## Supplemental Fig. S1

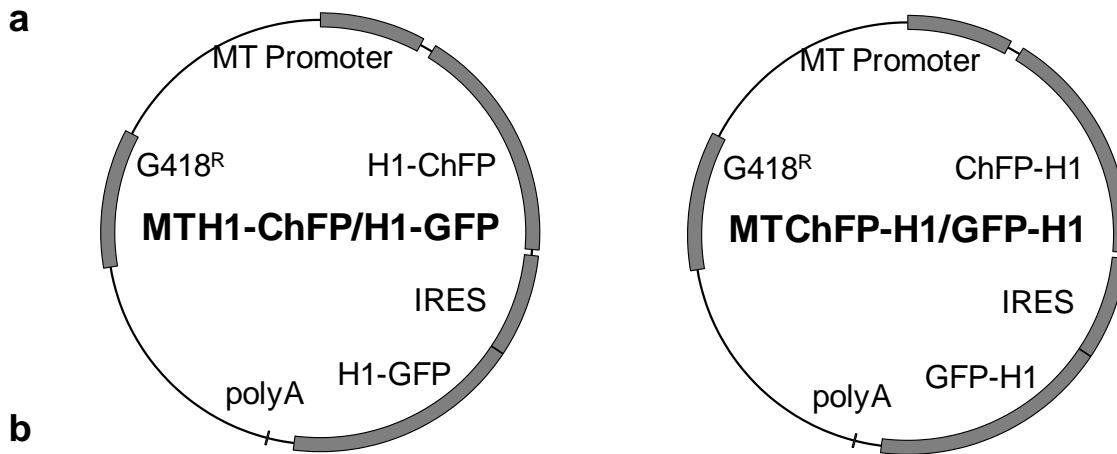

H1<sup>0</sup>-ChFP

**MTENSTSAPAAKPKRAKASKKSTDHPKYSDMI VAAIQAEKNRAGSSRQSIQKYIKSHYKVGENADSQIKLSIKRLVTT  
GVLKQTKGVGASGSFRLAKGDEPKRSVAFKKTKEVKKVATPKKAAKPKKAASKAPSKKPKATPVKKKKKPAATPKKA  
KKPKVVKVPVKASKPKKAKTVKPKAKSSAKRGSKKK** **MVSKGEEDNMAI** **IK** **EFMRFKVHMEGSVNGHEFEIEGEGEG  
RPYEGTQTAKLKVTKGGPLPFAWDILSPQFMYGSKAYVKHPADIPDYLKLSFPEGFKWERVMNFEDGGVVTVTQDSSL  
QDGEFIYKVKLRGTNFPDGPVMQKKTMGWEASSERMYPEDGALKGEIKQRLKLDGGHYDAEVKTTYKAKKPVQLPG  
AYNVNIKLDITSHNEDYTIVEQYERAEGRHSTGGMDELYK** **SGLRSRPRRQRTAFLNIKGMG**

H1<sup>0</sup>-GFP

**MTENSTSAPAAKPKRAKASKKSTDHPKYSDMI VAAIQAEKNRAGSSRQSIQKYIKSHYKVGENADSQIKLSILVTTGV  
LKQTKGVGASGSFRLAKGDEPKRSVAFKKTKEVKKVATPKKAAKPKKAASKAPSKKPKATPVKKAKKKPAATPKKAK  
KPKVVKVPVKASKPKKAKTVKPKAKSSAKRGSKKK** **MVSKGEELFTGVVPI** **LV** **ELDGDVNGHKFSVSGEGEGDATYG  
KLTTLKFICTTGKLPVPWPTLVTTLTLYGVQCF** **SRYPDHMKQHDF** **FKSAMPEGYVQERTIFFKDDGNYKTRAEVKFEGDT  
LVNRIELKGI** **DFKEDGNI** **LGHKLEYNYN** **SHNVYIMADKQKNGIKVNFKIRHNI** **EDGSVQLADHYQQNTPI** **GDGPVLLP  
DNHYLSTQSALS** **KDPNEKRDHMLLEFVTAAGITLGMDELYK** **SGLRSRPRRQRTAFLNIKGMG**

ChFP-H1<sup>0</sup>

**MVSKGEEDNMAI** **IK** **EFMRFKVHMEGSVNGHEFEIEGEGEGRPYEGTQTAKLKVTKGGPLPFAWDILSPQFMYGSKAYV  
KHPADIPDYLKLSFPEGFKWERVMNFEDGGVVTVTQDSSLQDGEFIYKVKLRGTNFPDGPVMQKKTMGWEASSERMY  
PEDGALKGEIKQRLKLDGGHYDAEVKTTYKAKKPVQLPGAYNVNIKLDITSHNEDYTIVEQYERAEGRHSTGGMDELY  
K** **SGLRSRPRRQRTAFLNI** **AMATENSTSAPAAKPKRAKASKKSTDHPKYSDMI VAAIQAEKNRAGSSRQSIQKYIKSHY  
KVGENADSQIKLSIKRLVTTGVLKQTKGVGASGSFRLAKGDEPKRSVAFKKTKEVKKVATPKKAAKPKKAASKAPSK  
KPKATPVKKAKKKPAATPKKAKKPKVVKVPVKASKPKKAKTVKPKAKSSAKRGSKKK**

GFP-H1<sup>0</sup>

**MVSKGEELFTGVVPI** **LV** **ELDGDVNGHKFSVSGEGEGDATY** **GKLTTLKFICTTGKLPVPWPTLVTTLTLYGVQCF** **SRYPDH  
MKQHDF** **FKSAMPEGYVQERTIFFKDDGNYKTRAEVKFEGDTLVNRIELKGI** **DFKEDGNI** **LGHKLEYNYN** **SHNVYIMAD  
KQKNGIKVNFKIRHNI** **EDGSVQLADHYQQNTPI** **GDGPVLLP** **DNHYLSTQSALS** **KDPNEKRDHMLLEFVTAAGITLGM  
DELYK** **SGLRSRPRRQRTAFLNI** **AMATENSTSAPAAKPKRAKASKKSTDHPKYSDMI VAAIQAEKNRAGSSRQSIQKYI  
KSHYKVGENADSQIKLSIKRLVTTGVLKQTKGVGASGSFRLAKGDEPKRSVAFKKTKEVKKVATPKKAAKPKKAASK  
APSKKPKATPVKKAKKKPAATPKKAKKPKVVKVPVKASKPKKAKTVKPKAKSSAKRGSKKK**

**Supplemental Fig. S1.** Constructs used in this study. (a) Representative maps of expression vectors. Transcription is driven by the mouse metallothionine I promoter. The IRES sequence was derived from pIRES2AcGFP (Clontech). (b) Sequences of expressed hybrid proteins. Histone coding sequences are in bold. GFP and ChFP are appropriately colored.



## Supplemental Fig. S3

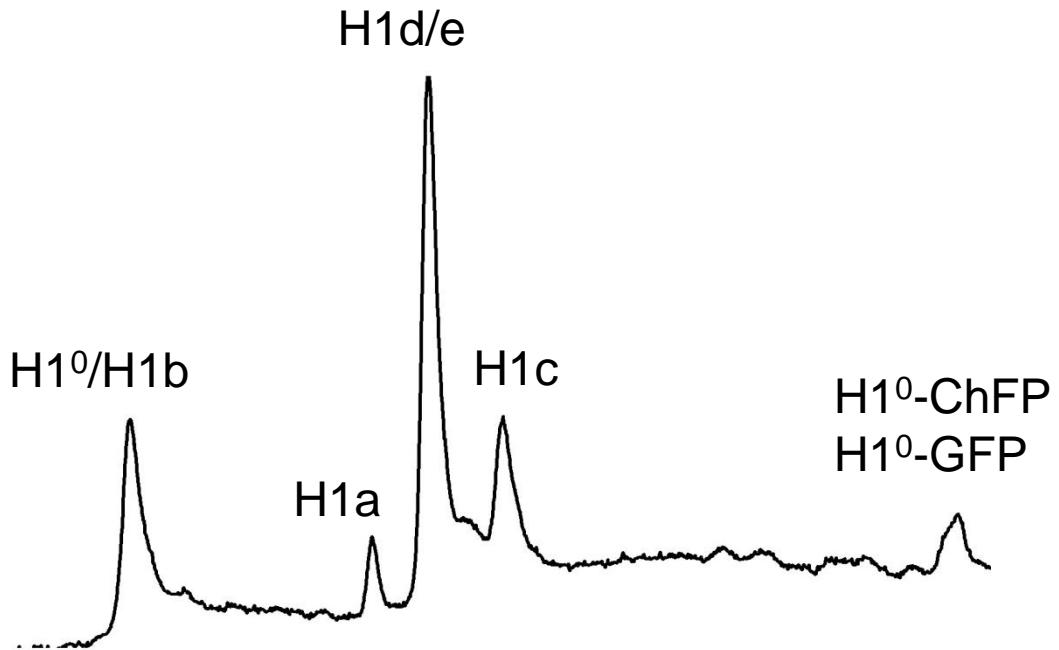

Supplemental Fig. S3. HPLC separation of H1 proteins. H1 proteins were extracted from a cell line expressing H1<sup>0</sup>-ChFP and H1<sup>0</sup>-GFP and separated by HPLC as previously described (16). The peak containing the tagged proteins is not seen in control cells (16, data not shown).

## Supplemental Fig. S4

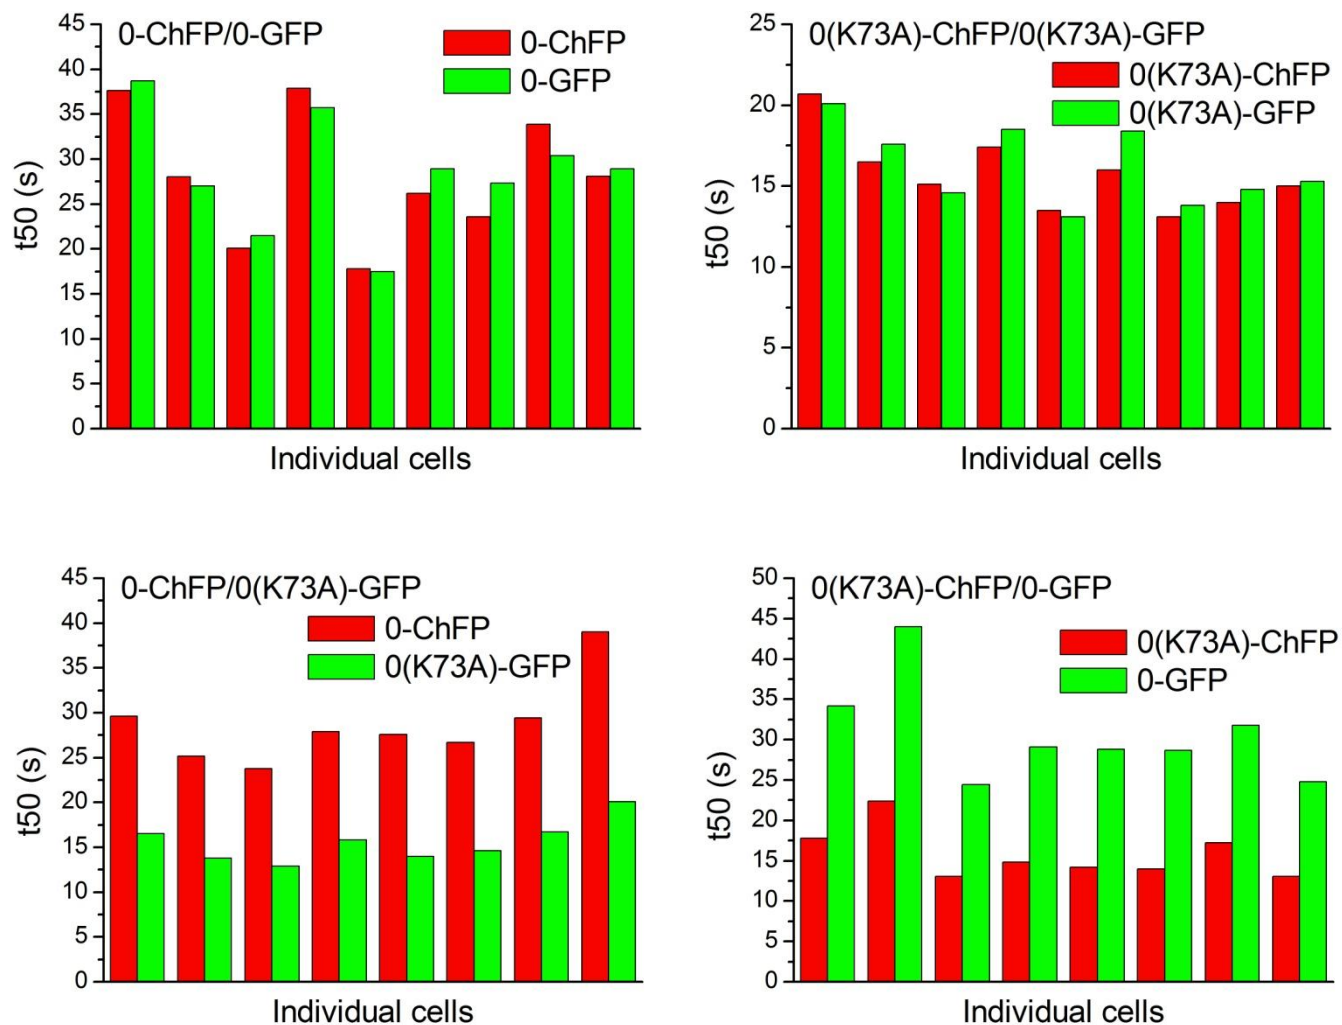

Supplemental Fig. S4. Comparison of  $t_{50}$  values for individual cells. Grouped pairs indicate the values obtained for the ChFP-tagged and GFP-tagged H1 proteins within a single cell. Data for averaged recovery curves are shown in Fig. 2

## Supplemental Fig. S5

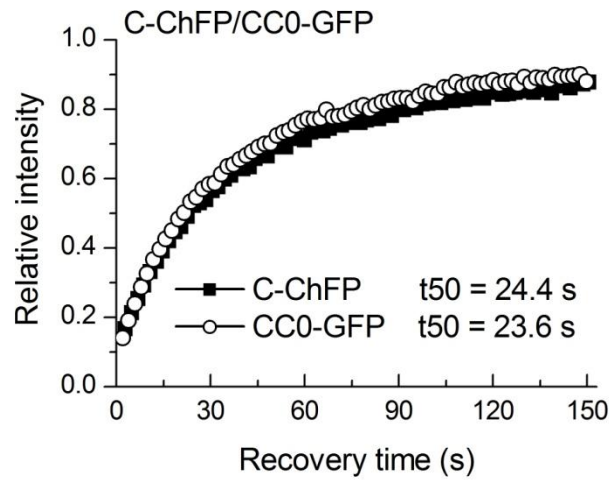

Supplemental Fig. S5. FRAP analysis of C-ChFP/CC0-GFP. FRAP analysis with cells co-expressing WT H1c-ChFP and CC0-GFP. Values for the half time of recovery ( $t_{50}$ ) were determined as previously described (35) and represent means  $\pm$  S.D. of at-least 8 independent measurements from a pool of three stable cell lines. Error bars are omitted from the plots for clarity.

## Supplemental Fig. S6

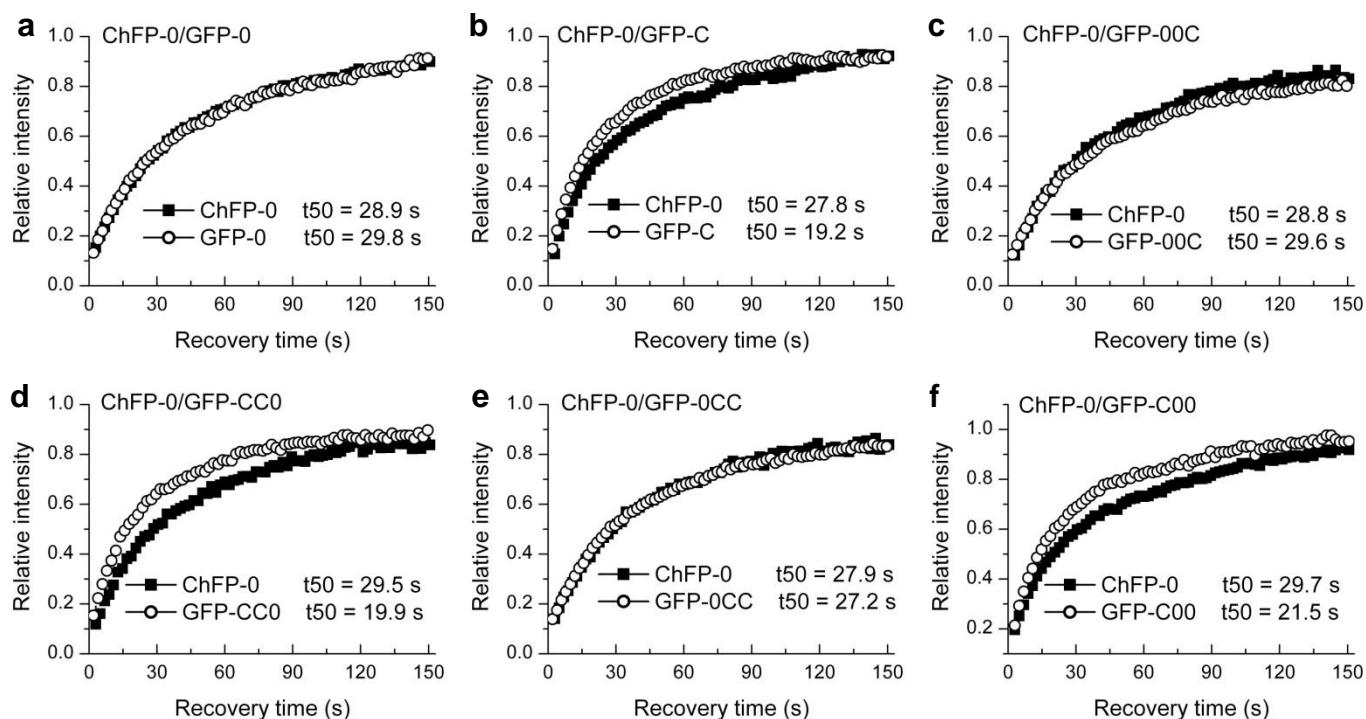

**Supplemental Fig. S6.** Quantitative analysis of the relative binding kinetics of N-tagged H1<sup>0</sup> and H1c and effects of swapping their terminal domains. FRAP analyses with cells co-expressing (a) ChFP-H1<sup>0</sup> and GFP-H1<sup>0</sup> (b) ChFP-H1<sup>0</sup> and GFP-H1c show faster recovery kinetics for H1c than H1<sup>0</sup>. Simultaneous recovery curves of the C-terminal switch mutants (c) GFP-00C relative to ChFP-H1<sup>0</sup> and (d) GFP-CC0 relative to ChFP-H1<sup>0</sup> and of the N-terminal switch mutants (e) GFP-0CC relative to ChFP-H1<sup>0</sup> and (f) GFP-C00 relative to ChFP-H1<sup>0</sup>. Values for the half time of recovery ( $t_{50}$ ) were determined as previously described (35) and represent means  $\pm$  S.D. of at-least 6 independent measurements from a pool of three stable cell lines. Error bars are omitted from the plots for clarity. Supplemental Table 1 provides the corresponding statistical analyses.
