# Supplementary material
Source: PubMed Central journal article supplement (PMC3320926)
Supplement: supp_M111.312819_jbc.M111.312819-2.pdf [file supp_M111.312819_jbc.M111.312819-2.pdf]

**Supplemental Table 1****Quantitative analysis of WT H1<sup>0</sup> versus WT H1c and their domain swap mutants with fluorescent proteins fused to their N-terminus.**

| Construct              | $t_{50}$ (sec) <sup>a</sup> |                   | $t_{50}$ Ratio       | <i>P</i> value <sup>b</sup> |
|------------------------|-----------------------------|-------------------|----------------------|-----------------------------|
|                        | ChFP                        | GFP               | GFP/ChFP             |                             |
| <b>ChFP-0/ GFP-0</b>   | 28.9 ± 1.3 (0.05)           | 29.8 ± 1.4 (0.05) | 1.03 ± 0.004 (0.004) | 0.3020                      |
| <b>ChFP-0/ GFP-C</b>   | 27.8 ± 5.8 (0.2)            | 19.2 ± 4.7 (0.25) | 0.69 ± 0.20 (0.14)   | 0.0007                      |
| <b>ChFP-0/ GFP-00C</b> | 28.8 ± 4.9 (0.17)           | 29.6 ± 5.4 (0.18) | 1.02 ± 0.06 (0.06)   | 0.2637                      |
| <b>ChFP-0/ GFP-CC0</b> | 29.5 ± 7.1 (0.24)           | 19.9 ± 5.7 (0.29) | 0.67 ± 0.08 (0.12)   | 0.0014                      |
| <b>ChFP-0/ GFP-0CC</b> | 27.9 ± 3.6 (0.13)           | 27.2 ± 2.9 (0.10) | 0.97 ± 0.06 (0.06)   | 0.3796                      |
| <b>ChFP-0/ GFP-C00</b> | 29.7 ± 4.5 (0.15)           | 21.5 ± 4.6 (0.21) | 0.71 ± 0.06 (0.08)   | 0.0001                      |

<sup>a</sup> Values for  $t_{50}$  were determined as previously described (35). Values are the mean ± S.D. from at least 8 independent measurements. Values in parentheses denote the calculated coefficient of variation.

<sup>b</sup> H1-GFP versus H1-ChFP. Paired Student's *t*-test for H1-GFP
